# Supplementary material
Source: MDPI journal article supplement (https://www.mdpi.com/2304-6740/11/4/159)
Supplement: s1 [file s1]

# Carbon-Based Sb<sub>2</sub>(S, Se)<sub>3</sub> Solar Cells

Yue Deng <sup>1</sup>, Huicong Liu <sup>1</sup>, Hailiang Wang <sup>1</sup>, Yongfa Song <sup>1</sup>, Weiping Li <sup>1</sup>, Liquan Zhu <sup>1</sup>, Xiangfan Xie <sup>2</sup>,  
Shuang Xiao <sup>2,\*</sup> and Haining Chen <sup>1,\*</sup>

<sup>1</sup> School of Materials Science and Engineering, Beihang University, No. 37 Xueyuan Road, Haidian District, Beijing 100191, China

<sup>2</sup> Shenzhen Key Laboratory of Ultra-Intense Laser and Advanced Material Technology, Center for Advanced Material Diagnostic Technology, and College of Engineering Physics, Shenzhen Technology University, Shenzhen 518118, China

\* Correspondence: xiaoshuang@sztu.edu.cn (S.X.); chenhaining@buaa.edu.cn (H.C.)

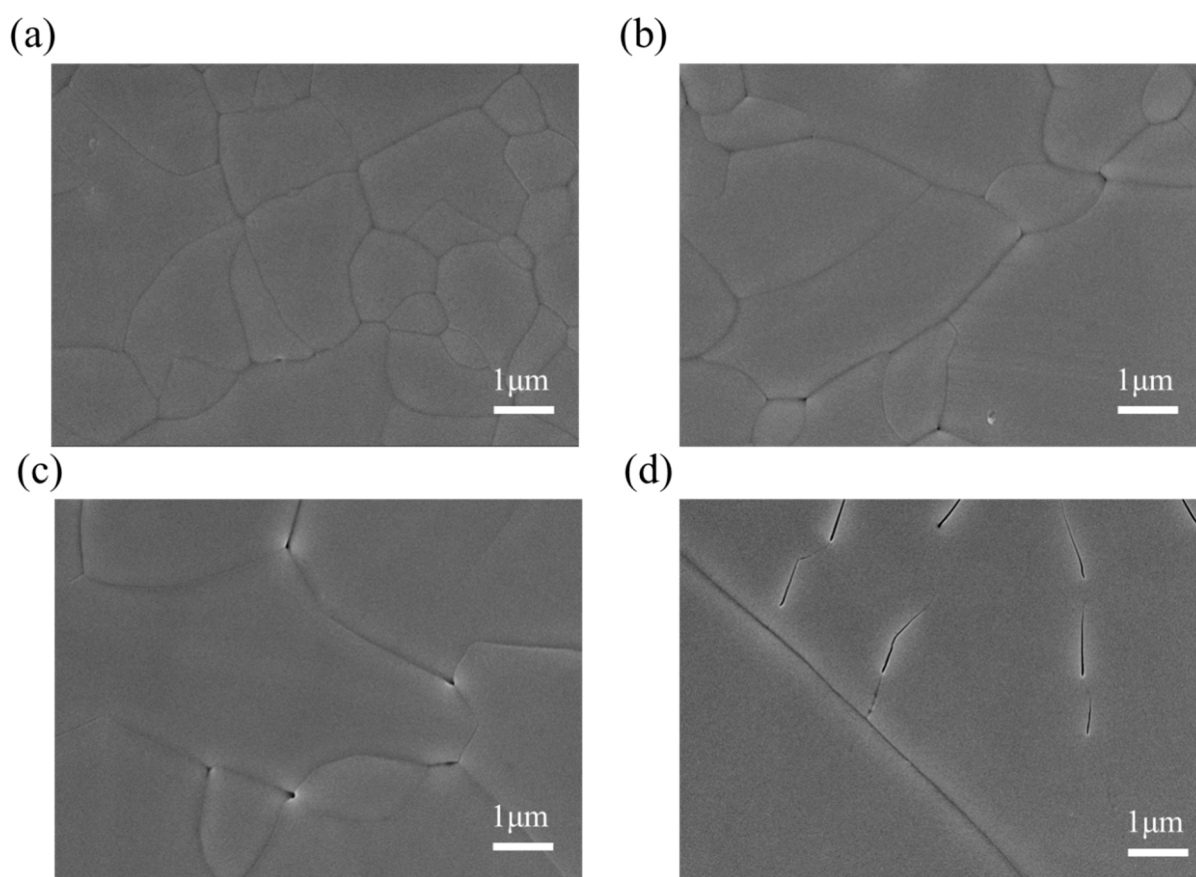

**Figure S1.** SEM images of  $\text{Sb}_2\text{S}_3/\text{Sb}_2(\text{S}, \text{Se})_3$  films with different deposition durations of the  $\text{Sb}_2\text{S}_3$  films: (a) 1 h, (b) 2 h, (c) 3 h and (d) 4 h.

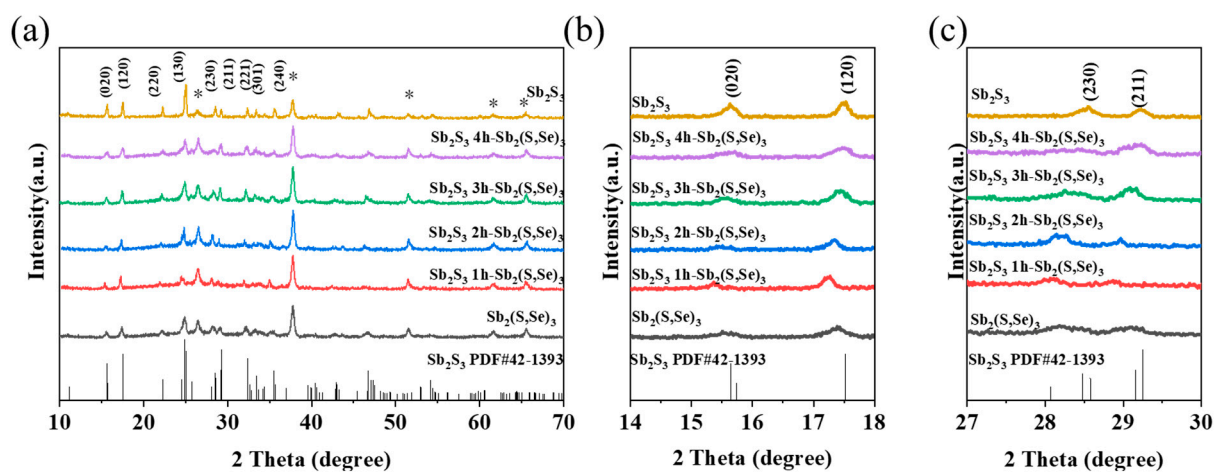

**Figure S2.** (a) XRD patterns of the Sb<sub>2</sub>S<sub>3</sub>, Sb<sub>2</sub>(S, Se)<sub>3</sub>, Sb<sub>2</sub>S<sub>3</sub>/Sb<sub>2</sub>(S, Se)<sub>3</sub> films. XRD patterns in the 2θ range of (b) 14 ~ 18° and (c) 27 ~ 33°.

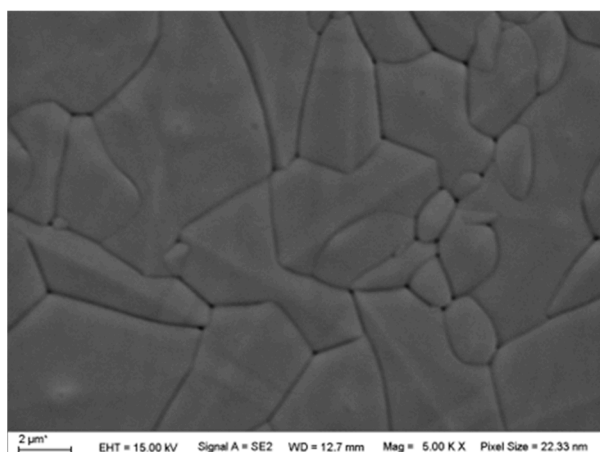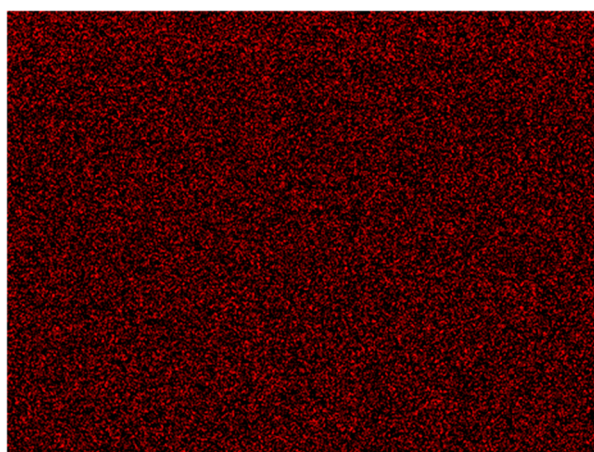

Se La1\_2

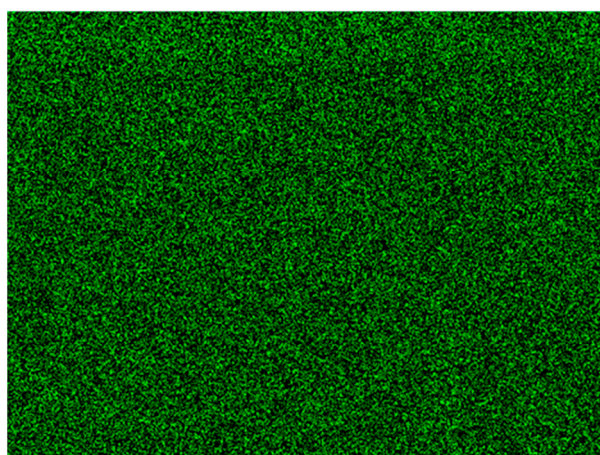

S Ka1

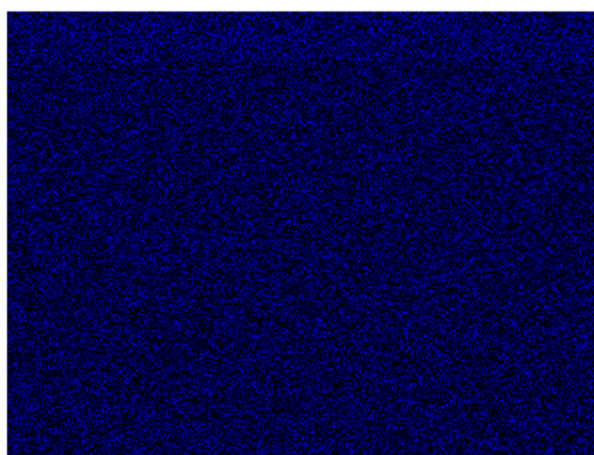

Sb La1

**Figure S3.** EDS element mappings of  $\text{Sb}_2\text{S}_3/\text{Sb}_2(\text{S}, \text{Se})_3$  films with the pre-deposition of  $\text{Sb}_2\text{S}_3$  for 3 h.

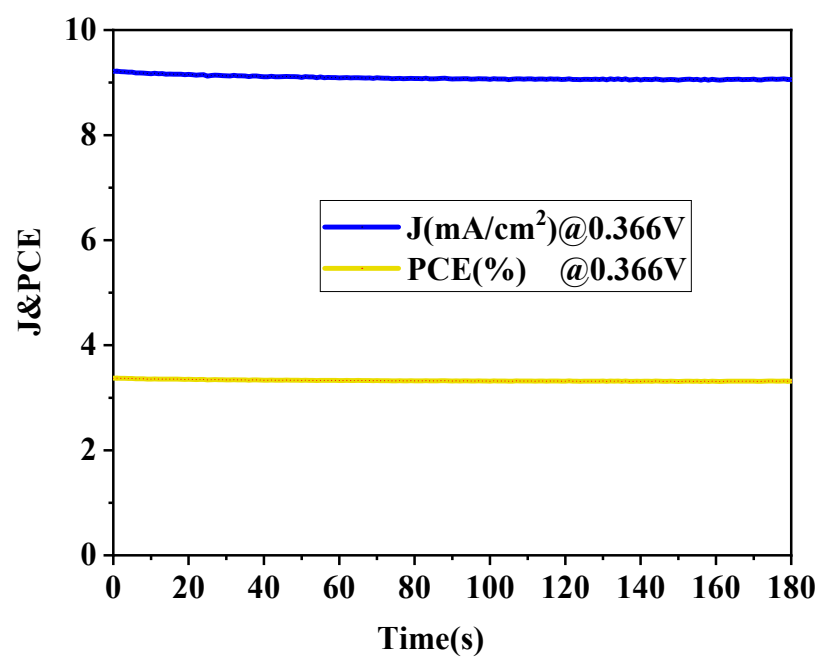

**Figure S4.** Steady-state power output of  $\text{Sb}_2\text{S}_3/\text{Sb}_2(\text{S}, \text{Se})_3$  based solar cells with P3HT.
